# Supplementary material for: Template-free synthesis of Ta3N5 nanorod arrays for efficient photoelectrochemical water splitting
Source: Royal Society of Chemistry journal article supplement (doi:10.1039/c3cc40760h), 2013-01-01
Supplement: c3cc40760h.pdf [file c3cc40760h.pdf]

## Electronic Supplementary Information

Template-free synthesis of Ta<sub>3</sub>N<sub>5</sub> nanorod arrays for efficient photoelectrochemical water splitting

**Fabrication of Ta<sub>3</sub>N<sub>5</sub> nanorod arrays:** Ta foil with a thickness of 0.25 mm (Alfa Aesar) was successively washed in ethanol, acetone, isopropanol and deionized water each for 30 minutes before used. The clean Ta foil was suspended above a 0.1 M HF aqueous solution in a Teflon-lined autoclave, which was then heated at 180 °C for 24 h to grow Ta<sub>2</sub>O<sub>5</sub> nanorod arrays on the Ta foil. Heating the resultant Ta<sub>2</sub>O<sub>5</sub> nanorod arrays on the Ta foil under a gaseous atmosphere of NH<sub>3</sub> with a flow of 50 mL/min at 1000 °C for 6 h led to the formation of Ta<sub>3</sub>N<sub>5</sub> nanorod arrays.

**Deposition of Co(OH)<sub>x</sub> nanoparticles on Ta<sub>3</sub>N<sub>5</sub> nanorod arrays:** A successive ionic layer adsorption and reaction method was used to deposit Co(OH)<sub>x</sub> nanoparticles on the photoelectrodes. The Ta<sub>3</sub>N<sub>5</sub> nanorod array photoelectrodes were successively immersed in an aqueous solution of Co(CH<sub>3</sub>COO)<sub>2</sub> (0.05 M), deionized water, an aqueous solution of NaOH (0.1 M) and deionized water each for one minute to finish one cycle deposition of Co(OH)<sub>x</sub> nanoparticles. By repeating the above deposition cycle, the desired amount of Co(OH)<sub>x</sub> nanoparticles can be loaded on the photoelectrodes.

**Characterization:** X-ray diffraction patterns of the samples were recorded on a Rigaku diffractometer using Cu K $\alpha$  irradiation. SEM and TEM images were obtained on a Nova NanoSEM 430 and JEOL 2010, respectively. Diffuse reflectance absorption spectra were recorded using a UV-visible spectrophotometer (JASCO-550). The chemical states were analyzed using X-ray photoelectron spectroscopy (Thermo Escalab 250, a monochromatic Al K $\alpha$  X-ray source). Binding energy was referenced to the C 1s peak (284.6 eV) arising from adventitious carbon.

**Photoelectrochemical measurements:** The photoelectrochemical water splitting was carried out in a three-electrode system, where the prepared nanorod array films, Ag@AgCl electrode and Pt foil act as working electrode, reference electrode and

counter electrode, respectively, in the electrolyte of aqueous 1 M NaOH solution under AM 1.5G illumination with a density of  $100 \text{ mWcm}^{-2}$  (Newport). According to the Nernst equation ( $E_{\text{RHE}} = E_{\text{Ag/AgCl}} + 0.059\text{pH} + 0.196$ ), the measured potentials vs the RHE scale can be obtained from the potentials vs Ag/AgCl. The wavelength dependent incident photon-to-current conversion efficiency was calculated according to the following equation:

$$\text{IPCE (\%)} = [1240 \times \text{photocurrent density (mAcm}^{-2}\text{)}] / [\text{wavelength (nm)} \times \text{photon flux (mW cm}^{-2}\text{)}] \times 100\%$$

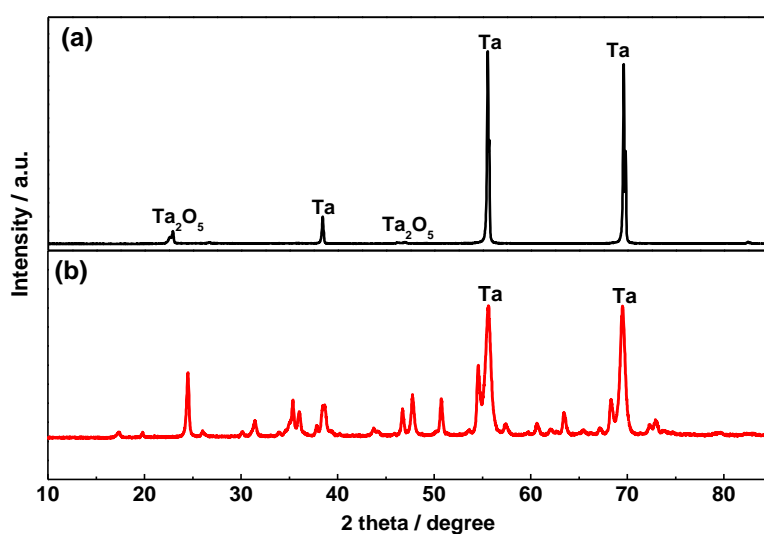

**Figure S1** XRD patterns of (a) F-Ta<sub>2</sub>O<sub>5</sub> nanorod arrays and (b) Ta<sub>3</sub>N<sub>5</sub> nanorod arrays on the Ta substrates.

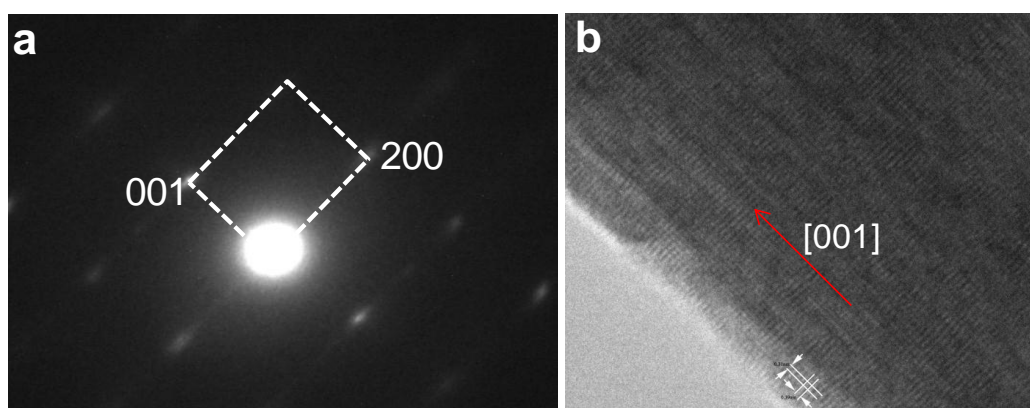

**Figure S2** Selected electron area diffraction pattern and high resolution TEM image recorded from a single Ta<sub>2</sub>O<sub>5</sub> nanorod.

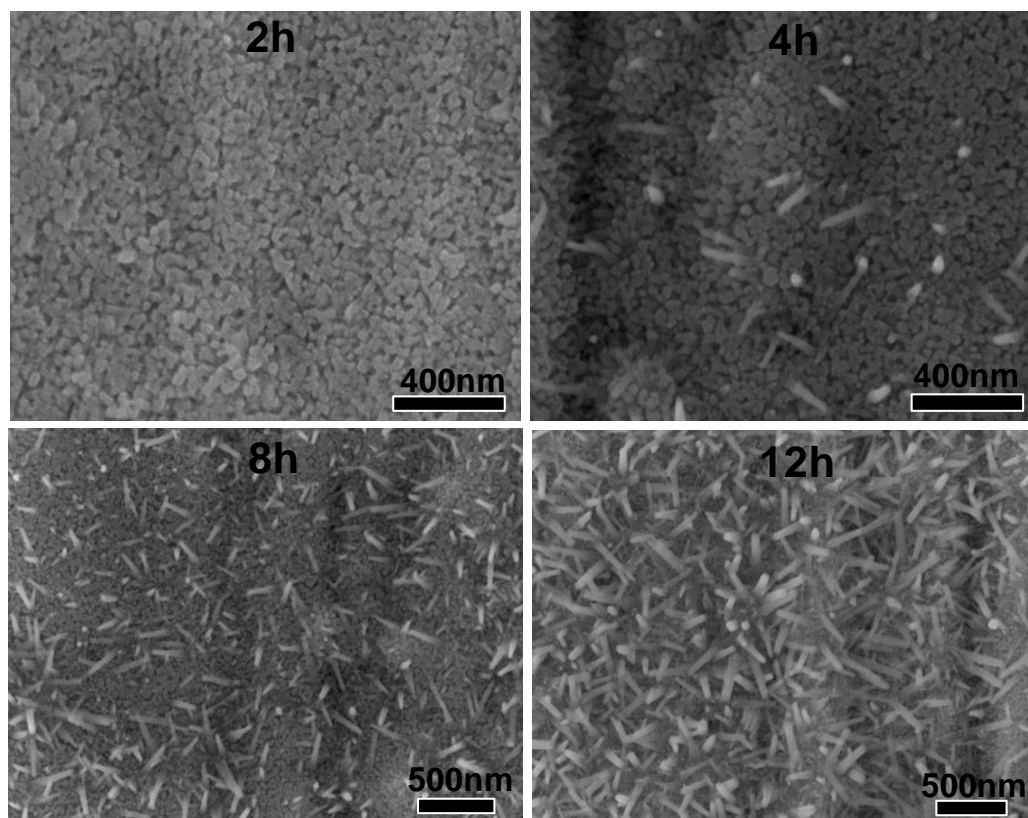

**Figure S3** Time dependent growth processes (2 h, 4 h, 8 h and 12 h) of F-Ta<sub>2</sub>O<sub>5</sub> nanorods on Ta substrates during the VPH process.

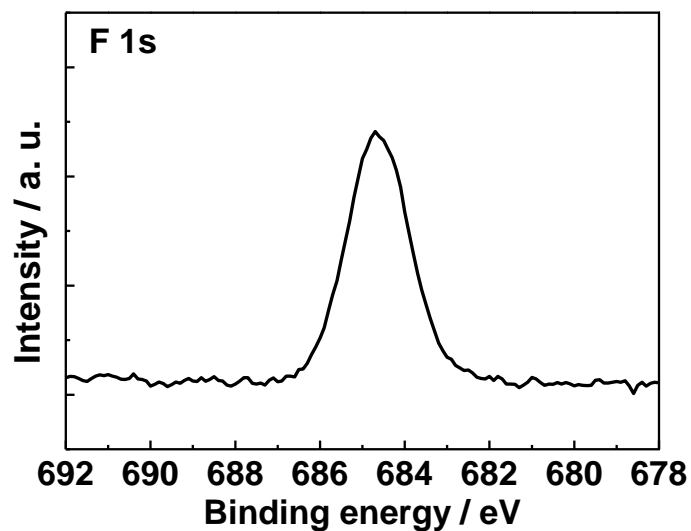

**Figure S4** High resolution XPS spectrum of F 1s recorded from the F-Ta<sub>2</sub>O<sub>5</sub> nanorod array film.

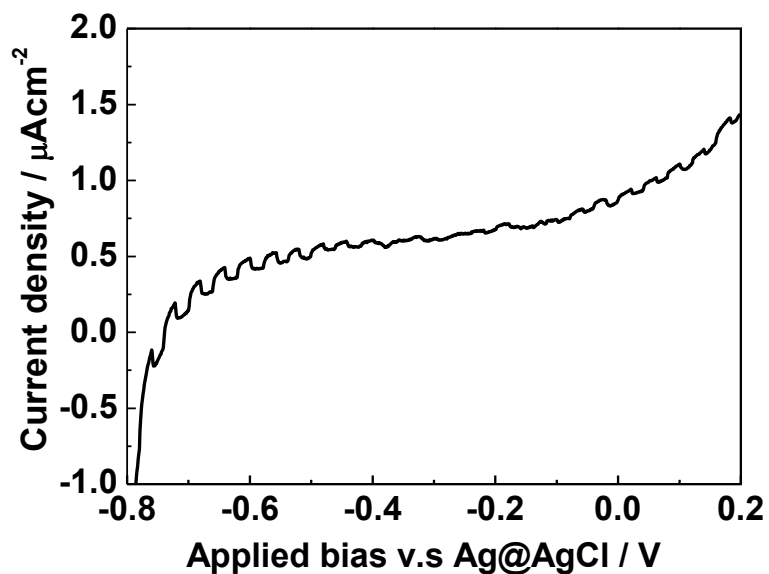

**Figure S5** Applied potential bias-dependent photocurrent density of F-Ta<sub>2</sub>O<sub>5</sub> nanorod arrays. The curves were measured in 0.2 M Na<sub>2</sub>SO<sub>4</sub> aqueous solution (pH=6.8) under AM 1.5G simulated sunlight at 100 mWcm<sup>-2</sup>.

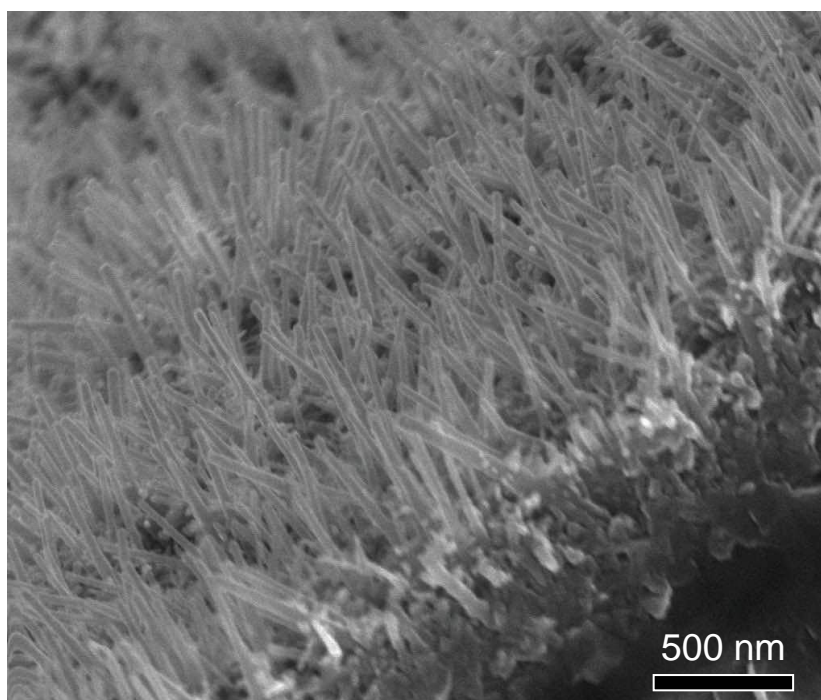

**Figure S6** The cross-section SEM image of the Ta<sub>3</sub>N<sub>5</sub> nanorod arrays on the Ta substrate.

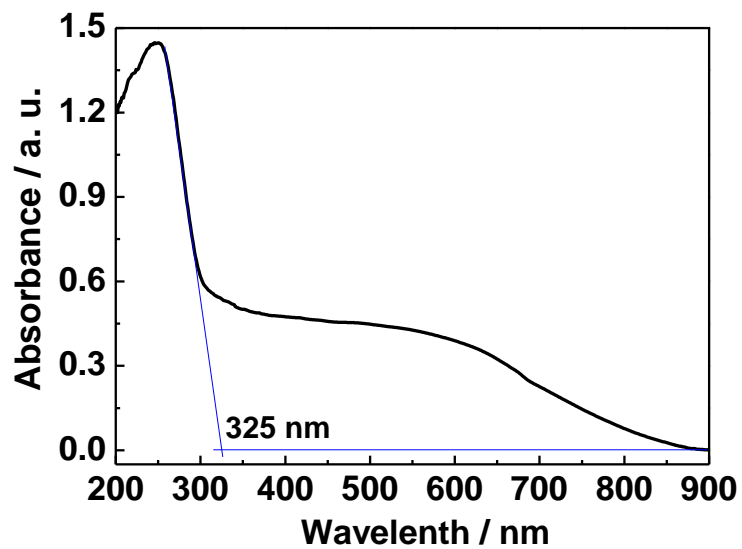

**Figure S7** UV-visible absorption spectrum of F-Ta<sub>2</sub>O<sub>5</sub> nanorod arrays.

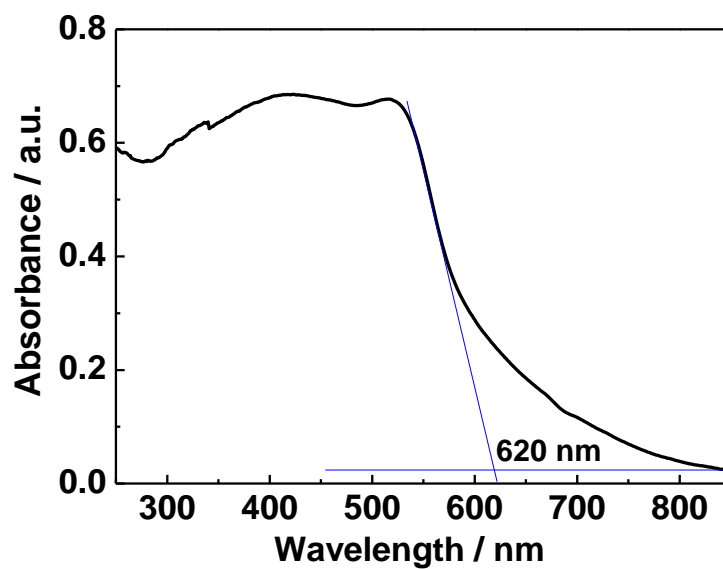

**Figure S8** UV-visible absorption spectrum of Ta<sub>3</sub>N<sub>5</sub> nanorod arrays.

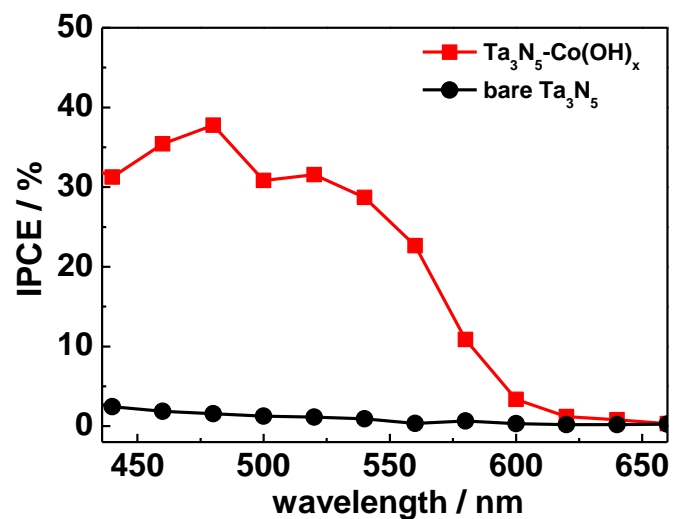

**Figure S9** Wavelength dependent IPCE curves of bare Ta<sub>3</sub>N<sub>5</sub> and Co(OH)<sub>x</sub>-modified Ta<sub>3</sub>N<sub>5</sub> nanorod arrays, measured in 1 M NaOH aqueous solution at 1.23V<sub>RHE</sub>.
